# Supplementary material for: Loss of the MAF Transcription Factor in Laryngeal Squamous Cell Carcinoma
Source: MDPI journal article supplement (doi:10.3390/biom11071035), 2021-07-15
Supplement: s1 [file s1]

## Supplementary Materials

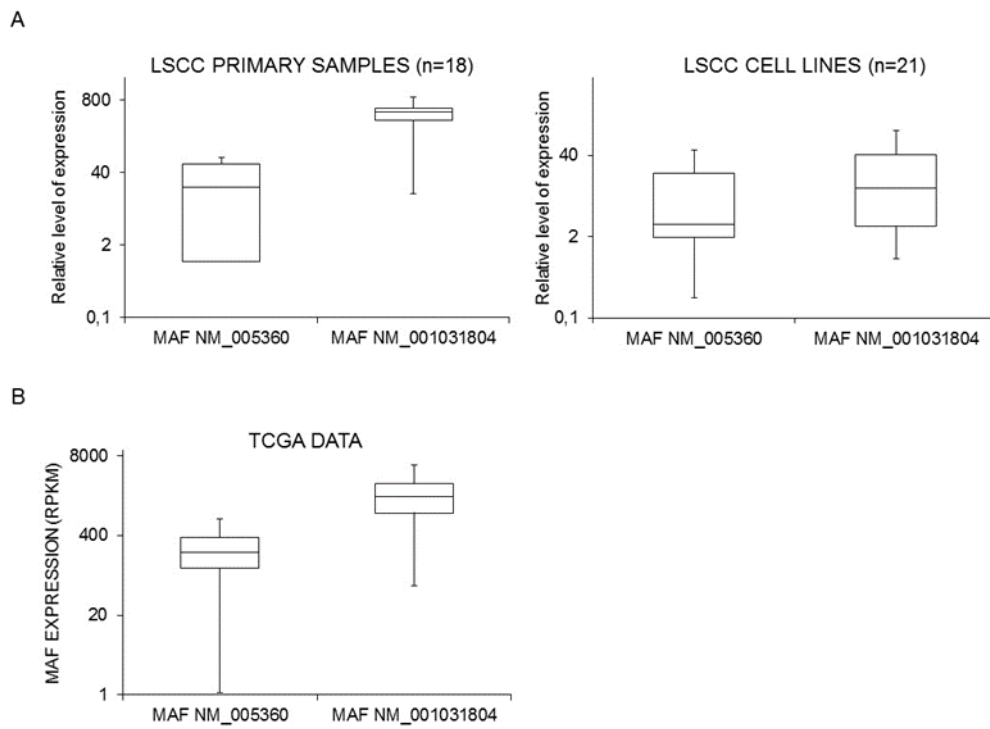

**Figure S1.** Expression level of both *MAF* isoforms in LSCC cell lines and tumors analyzed by real-time qPCR (A) as well as in 100 LSCC tumors from TCGA database (B). RPKM: Reads Per Kilobase Million.

**Table S1.** Characterization of LSCC cell lines used for bisulfite pyrosequencing. UT-SCC: University of Turku – Squamous Cell Carcinoma; M: male; F: female; TNM: TNM classification (T-tumor; N- lymph node involvement; M-distant metastases); Pri - primary tumor; Rec - recurrence; Met - metastasis; Per - persistent tumor; G - tumor grade, NA - data not available.

| Cell line   | Sex | Age (yrs) | Primary tumorlocation       | TNM                                                           | Specimen site       | Type of lesion | Grade |
|-------------|-----|-----------|-----------------------------|---------------------------------------------------------------|---------------------|----------------|-------|
| UT-SCC-106A | M   | 59        | SCC plicae vocalis          | T <sub>1A</sub> N <sub>0</sub> M <sub>0</sub>                 | larynx              | pri            | G2    |
| UT-SCC-106B | M   | 59        | SCC plicae vocalis          | rT <sub>3</sub> N <sub>0</sub> M <sub>0</sub>                 | larynx              | rec            | G3    |
| UT-SCC-107  | M   | 46        | SCC laryngis supraglottidis | T <sub>4</sub> N <sub>2c</sub> M <sub>0</sub>                 | larynx              | pri            | G2    |
| UT-SCC-108  | M   | 68        | SCC laryngis supraglottidis | T <sub>2</sub> N <sub>0</sub> M <sub>0</sub>                  | larynx              | pri            | G3    |
| UT-SCC-11   | M   | 58        | glottic larynx              | T <sub>1</sub> N <sub>0</sub> M <sub>0</sub>                  | larynx              | rec            | G2    |
| UT-SCC-113  | M   | 50        | SCC laryngis transglottica  | T <sub>3</sub> N <sub>0</sub> M <sub>0</sub>                  | larynx              | pri            | G3    |
| UT-SCC-116  | M   | 60        | SCC laryngis supraglottidis | T <sub>4</sub> N <sub>1</sub> M <sub>0</sub>                  | larynx              | pri            | G2    |
| UT-SCC-13   | M   | 53        | supraglottic larynx         | T <sub>3</sub> N <sub>0</sub> M <sub>0</sub>                  | larynx              | rec            | G2    |
| UT-SCC-19A  | M   | 44        | glottic larynx              | T <sub>4</sub> N <sub>0</sub> M <sub>0</sub>                  | larynx              | pri            | G2    |
| UT-SCC-19B  | M   | 44        | glottic larynx              | T <sub>4</sub> N <sub>0</sub> M <sub>0</sub>                  | larynx              | pri (per)      | G2    |
| UT-SCC-22   | M   | 79        | glottic larynx              | T <sub>1</sub> N <sub>0</sub> M <sub>0</sub>                  | larynx              | rec            | G2    |
| UT-SCC-23   | M   | 66        | SCC transglottica           | T <sub>3</sub> N <sub>0</sub> M <sub>0</sub>                  | larynx              | pri (per)      | G1    |
| UT-SCC-29   | M   | 82        | glottic larynx              | T <sub>2</sub> N <sub>0</sub> M <sub>0</sub>                  | larynx              | pri            | G1    |
| UT-SCC-34   | M   | 63        | supraglottic larynx         | T <sub>4</sub> N <sub>0</sub> M <sub>0</sub>                  | supraglottic larynx | pri            | G1    |
| UT-SCC-35   | M   | 50        | glottic larynx              | T <sub>2</sub> N <sub>0</sub> M <sub>0</sub>                  | larynx              | resid          | G2    |
| UT-SCC-38   | M   | 66        | glottic larynx              | T <sub>2</sub> N <sub>0</sub> M <sub>0</sub>                  | larynx              | pri            | G2    |
| UT-SCC-50   | M   | 70        | glottic larynx              | T <sub>2</sub> N <sub>0</sub> ;rT <sub>2</sub> N <sub>0</sub> | larynx              | rec            | G3    |
| UT-SCC-57   | M   | 76        | glottic larynx              | T <sub>2</sub> N <sub>0</sub> M <sub>0</sub>                  | larynx              | rec            | G1-G2 |
| UT-SCC-6A   | F   | 51        | supraglottic larynx         | T <sub>2</sub> N <sub>1</sub> M <sub>0</sub>                  | larynx              | rec            | G1    |
| UT-SCC-6B   | F   | 51        | supraglottic larynx         | T <sub>2</sub> N <sub>1</sub> M <sub>0</sub>                  | neck                | met            | G1    |
| UT-SCC-75   | M   | 56        | SCC laryngis                | T <sub>2</sub> N <sub>2B</sub> M <sub>0</sub>                 | larynx              | pri            | G2    |

**Table S2.** Characterization of LSCC primary samples used for real-time qPCR. TNM: TNM classification (T-tumor; N-lymph node involvement; M-distant metastases); G - tumor grade, NA - data not available.

|                      | Probe | Localization | TNM                                            | Grade |
|----------------------|-------|--------------|------------------------------------------------|-------|
| LSCC Primary samples | 1     | Larynx       | T <sub>4</sub> N <sub>2</sub> M <sub>0</sub>   | NA    |
|                      | 2     | Larynx       | T <sub>3</sub> N <sub>0</sub> M <sub>0</sub>   | G2    |
|                      | 3     | Larynx       | T <sub>4</sub> N <sub>1</sub> M <sub>0</sub>   | G1    |
|                      | 4     | Larynx       | T <sub>3</sub> N <sub>1</sub> M <sub>0</sub>   | G2    |
|                      | 5     | Larynx       | T <sub>4</sub> N <sub>1</sub> M <sub>1</sub>   | NA    |
|                      | 6     | Larynx       | T <sub>4</sub> N <sub>0</sub> M <sub>0</sub>   | G1    |
|                      | 7     | Larynx       | T <sub>4</sub> N <sub>1</sub> M <sub>0</sub>   | G2    |
|                      | 8     | Larynx       | T <sub>3</sub> N <sub>1</sub> M <sub>0</sub>   | G2    |
|                      | 9     | Larynx       | T <sub>4</sub> N <sub>0</sub> M <sub>0</sub>   | G1    |
|                      | 10    | Larynx       | T <sub>4</sub> N <sub>2</sub> M <sub>0</sub>   | G2    |
|                      | 11    | Larynx       | T <sub>4</sub> N <sub>1</sub> M <sub>0</sub>   | G1    |
|                      | 12    | Larynx       | T <sub>4a</sub> N <sub>2b</sub> M <sub>0</sub> | G2    |
|                      | 13    | Larynx       | T <sub>4</sub> N <sub>1</sub> M <sub>0</sub>   | G2    |
|                      | 14    | Larynx       | T <sub>4</sub> N <sub>3</sub> M <sub>0</sub>   | G1    |
|                      | 15    | Larynx       | T <sub>4</sub> N <sub>2</sub> M <sub>0</sub>   | G2    |
|                      | 16    | Larynx       | T <sub>4</sub> N <sub>1</sub> M <sub>0</sub>   | G2    |
|                      | 17    | Larynx       | T <sub>3</sub> N <sub>1</sub> M <sub>0</sub>   | G2    |
|                      | 18    | Larynx       | T <sub>4</sub> N <sub>1</sub> M <sub>0</sub>   | G2    |

**Table S3.** Illumina methylation probes with annotated position and mean methylation level in 111 laryngeal primary tumor cases (TCGA-HNSC project).

| Tag Name   | Position (GRCh37/hg19)      | Mean Methylation Level |
|------------|-----------------------------|------------------------|
| cg00509921 | chr16:79,632,332-79,632,332 | 0,07                   |
| cg04132983 | chr16:79,632,621-79,632,621 | 0,15                   |
| cg06834240 | chr16:79,632,626-79,632,626 | 0,11                   |
| cg04626565 | chr16:79,632,784-79,632,784 | 0,08                   |
| cg07870982 | chr16:79,633,041-79,633,041 | 0,08                   |
| cg04858597 | chr16:79,633,453-79,633,453 | 0,05                   |
| cg07504616 | chr16:79,633,543-79,633,543 | 0,09                   |
| cg08553999 | chr16:79,633,724-79,633,724 | 0,08                   |
| cg06018531 | chr16:79,633,902-79,633,902 | 0,07                   |
| cg14055374 | chr16:79,634,410-79,634,410 | 0,03                   |
| cg06327596 | chr16:79,634,583-79,634,583 | 0,04                   |
| cg07242563 | chr16:79,634,675-79,634,675 | 0,02                   |
| cg06881580 | chr16:79,634,709-79,634,709 | 0,06                   |

|            |                             |      |
|------------|-----------------------------|------|
| cg02962380 | chr16:79,634,724-79,634,724 | 0,05 |
| cg10689889 | chr16:79,634,732-79,634,732 | 0,05 |
| cg07026599 | chr16:79,634,737-79,634,737 | 0,03 |
| cg09822018 | chr16:79,635,284-79,635,284 | 0,08 |
| cg08475576 | chr16:79,635,404-79,635,404 | 0,05 |
| cg01001468 | chr16:79,635,425-79,635,425 | 0,03 |

**Table S4.** MAF associated CGH array tags.

| CGH Platform                  | Probe Name     | Position (NCBI36/hg18)      |
|-------------------------------|----------------|-----------------------------|
| Agilent Human Genome CGH 44K  | A_14_P101022   | chr16:78,185,404-78,185,463 |
|                               | A_14_P118163   | chr16:78,185,744-78,185,803 |
|                               | A_14_P118163   | chr16:78,185,923-78,185,969 |
|                               | A_14_P102896   | chr16:78,187,931-78,187,990 |
|                               | A_14_P139279   | chr16:78,219,082-78,219,141 |
| Agilent Human Genome CGH 244A | A_14_P139279   | chr16:78,219,082-78,219,141 |
|                               | A_16_P20533099 | chr16:78,178,440-78,178,499 |
|                               | A_14_P101022   | chr16:78,185,404-78,185,463 |
|                               | A_14_P118163   | chr16:78,185,744-78,185,803 |
|                               | A_14_P102782   | chr16:78,185,923-78,185,969 |
|                               | A_14_P102896   | chr16:78,187,931-78,187,990 |
|                               | A_16_P20533159 | chr16:78,195,459-78,195,518 |

**Table S5.** List of genes with at least one motif in the promoter region.

| Gene           | Position                 | Chromosomal localization | Name                                                                 | Locus type     |
|----------------|--------------------------|--------------------------|----------------------------------------------------------------------|----------------|
| <i>ABHD14B</i> | chr3:52002526-52008646   | 3p21.2                   | abhydrolase domain containing 14B                                    | protein coding |
| <i>ACKR4</i>   | chr3:132318981-132321485 | 3q22.1                   | atypical chemokine receptor 4                                        | protein coding |
| <i>ACVR1B</i>  | chr12:52347164-52390863  | 12q13.13                 | activin A receptor type 1B                                           | protein coding |
| <i>ACY1</i>    | chr3:52017551-52023213   | 3p21.2                   | aminoacylase 1                                                       | protein coding |
| <i>ARHGEF3</i> | chr3:56761448-56950464   | 3p14.3                   | Rho guanine nucleotide exchange factor 3                             | protein coding |
| <i>ARPC4</i>   | chr3:9834232-9848789     | 3p25.3                   | actin related protein 2/3 complex subunit 4                          | protein coding |
| <i>BMPRI1A</i> | chr10:88516376-88687726  | 10q23.2                  | bone morphogenetic protein receptor type 1A                          | protein coding |
| <i>CAB39L</i>  | chr13:49882786-49987887  | 13q14.2                  | calcium binding protein 39 like                                      | protein coding |
| <i>CCDC80</i>  | chr3:112315644-112359990 | 3q13.2                   | coiled-coil domain containing 80                                     | protein coding |
| <i>CDKL5</i>   | chrX:18460344-18671749   | Xp22.13                  | cyclin dependent kinase like 5                                       | protein coding |
| <i>CEP68</i>   | chr2:65283550-65314138   | 2p14                     | centrosomal protein 68                                               | protein coding |
| <i>CFLAR</i>   | chr2:201980887-202041410 | 2q33.1                   | CASP8 and FADD like apoptosis regulator                              | protein coding |
| <i>CPEB4</i>   | chr5:173315352-173388983 | 5q35.2                   | cytoplasmic polyadenylation element binding protein 4                | protein coding |
| <i>DERL3</i>   | chr22:24176690-24181193  | 22q11.23                 | derlin 3                                                             | protein coding |
| <i>DHRS9</i>   | chr2:169923587-169952677 | 2q31.1                   | dehydrogenase/reductase 9                                            | protein coding |
| <i>DMD</i>     | chrX:31137339-33357505   | Xp21.2-p21.1             | dystrophin                                                           | protein coding |
| <i>DPP4</i>    | chr2:162848755-162930725 | 2q24.2                   | dipeptidyl peptidase 4                                               | protein coding |
| <i>EHF</i>     | chr11:34654113-34684834  | 11p13                    | ETS homologous factor                                                | protein coding |
| <i>EPC1</i>    | chr10:32556644-32667697  | 10p11.22                 | enhancer of polycomb homolog 1                                       | protein coding |
| <i>ETFBKMT</i> | chr12:31812137-31826046  | 12p11.21                 | electron transfer flavoprotein subunit beta lysine methyltransferase | protein coding |

|                      |                           |               |                                                                        |                |
|----------------------|---------------------------|---------------|------------------------------------------------------------------------|----------------|
| <i>EVL</i>           | chr14:100437759-100610573 | 14q32.2       | Enah/Vasp-like                                                         | protein coding |
| <i>FKBP1A-SDCBP2</i> | chr20:1290553-1373816     | 20p13         | FKBP1A-SDCBP2 readthrough (NMD candidate)                              | lncRNA         |
| <i>FUCA1</i>         | chr1:24171571-24194859    | 1p36.11       | alpha-L-fucosidase 1                                                   | protein coding |
| <i>GMPPB</i>         | chr3:49757349-49761384    | 3p21.31       | GDP-mannose pyrophosphorylase B                                        | protein coding |
| <i>HAPLN3</i>        | chr15:89420525-89438775   | 15q26.1       | hyaluronan and proteoglycan link protein 3                             | protein coding |
| <i>HLA-DMB</i>       | chr6:32902413-32908805    | 6p21.32       | major histocompatibility complex, class II, DM beta                    | protein coding |
| <i>INAFM1</i>        | chr19:47777680-47778980   | 19q13.32      | InaF motif containing 1                                                | protein coding |
| <i>IPCEF1</i>        | chr6:154475618-154651215  | 6q25.2        | interaction protein for cytohesin exchange factors 1                   | protein coding |
| <i>IRF5</i>          | chr7:128577086-128590092  | 7q32.1        | interferon regulatory factor 5                                         | protein coding |
| <i>KALRN</i>         | chr3:123813528-124394274  | 3q21.2        | kalirin RhoGEF kinase                                                  | protein coding |
| <i>KIAA1217</i>      | chr10:24498067-24836772   | 10p12.2-p12.1 | sickle tail protein homolog                                            | protein coding |
| <i>MAP1B</i>         | chr5:71403302-71505390    | 5q13.2        | microtubule associated protein 1B                                      | protein coding |
| <i>MAU2</i>          | chr19:19431638-19469563   | 19p13.11      | MAU2 sister chromatid cohesion factor                                  | protein coding |
| <i>MGAT1</i>         | chr5:180211780-180229806  | 5q35.3        | alpha-1,3-mannosyl-glycoprotein 2-beta-N-acetylglucosaminyltransferase | protein coding |
| <i>MIR4271</i>       | chr3:49311553-49311619    | 3p21.31       | microRNA 4271                                                          | microRNA       |
| <i>MSRA</i>          | chr8:9911802-10286401     | 8p23.1        | methionine sulfoxide reductase A                                       | protein coding |
| <i>MXRA7</i>         | chr17:74668633-74707047   | 17q25.1       | matrix remodeling associated 7                                         | protein coding |
| <i>NFATC4</i>        | chr14:24836117-24848811   | 14q12         | nuclear factor of activated T cells 4                                  | protein coding |
| <i>NLRX1</i>         | chr11:119039434-119054725 | 11q23.3       | NLR family member X1                                                   | protein coding |
| <i>PDE1A</i>         | chr2:183001180-183291763  | 2q32.1        | phosphodiesterase 1A                                                   | protein coding |
| <i>PRODH</i>         | chr22:18900294-18924066   | 22q11.21      | proline dehydrogenase 1                                                | protein coding |

|                    |                           |               |                                                            |                     |
|--------------------|---------------------------|---------------|------------------------------------------------------------|---------------------|
| <i>RGL1</i>        | chr1:183605244-183897677  | 1q25.3        | ral guanine nucleotide dissociation stimulator like 1      | protein coding      |
| <i>SEC14L1</i>     | chr17:75084767-75213181   | 17q25.2-q25.3 | SEC14 like lipid binding 1                                 | protein coding      |
| <i>SETD1B</i>      | chr12:122242630-122270562 | 12q24.31      | SET domain containing 1B, histone lysine methyltransferase | protein coding      |
| <i>SLC13A4</i>     | chr7:135365980-135412934  | 7q33          | solute carrier family 13 member 4                          | protein coding      |
| <i>SLC16A9</i>     | chr10:61410522-61469649   | 10q21.2       | solute carrier family 16 member 9                          | protein coding      |
| <i>SNORA21</i>     | chr17:37009116-37009248   | 17q12         | small nucleolar RNA, H/ACA box 21                          | small nucleolar RNA |
| <i>SOX5</i>        | chr12:23682438-24102604   | 12p12.1       | SRY-box transcription factor 5                             | protein coding      |
| <i>TC2N</i>        | chr14:92246090-92302799   | 14q32.12      | tandem C2 domains, nuclear                                 | protein coding      |
| <i>TCF4</i>        | chr18:52889416-53255423   | 18q21.2       | transcription factor 4                                     | protein coding      |
| <i>TGFB3</i>       | chr14:76424404-76449354   | 14q24.3       | transforming growth factor beta 3                          | protein coding      |
| <i>TGM5</i>        | chr15:43524788-43559126   | 5q15.2        | transglutaminase 5                                         | protein coding      |
| <i>TLR5</i>        | chr1:223282746-223316590  | 1q41          | toll like receptor 5                                       | protein coding      |
| <i>TMEM254</i>     | chr10:81838402-81852307   | 10q22.3       | transmembrane protein 254                                  | protein coding      |
| <i>TMTC1</i>       | chr12:29653773-29936875   | 12p11.22      | transmembrane O-mannosyltransferase targeting cadherins 1  | protein coding      |
| <i>TMX4</i>        | chr20:7957993-8000408     | 20p12.3       | thioredoxin related transmembrane protein 4                | protein coding      |
| <i>TSPOAP1-AS1</i> | chr17:56414563-56431088   | 17q22         | TSPOAP1, SUPT4H1 and RNF43 antisense RNA 1                 | protein coding      |
| <i>ZBTB20</i>      | chr3:114033364-114866135  | 3q13.31       | zinc finger and BTB domain containing 20                   | protein coding      |
| <i>ZNF254</i>      | chr19:24216207-24312770   | 19p12         | zinc finger protein 254                                    | protein coding      |
| <i>ZNF331</i>      | chr19:54024268-54083523   | 19q13.42      | zinc finger protein 331                                    | protein coding      |
| <i>ZNF844</i>      | chr19:12175546-12192380   | 19p13.2       | zinc finger protein 844                                    | protein coding      |
| <i>CCDC80</i>      | chr3:112315641-112320816  | 3q13.2        | coiled-coil domain containing 80                           | protein coding      |

|               |                         |         |                         |                   |
|---------------|-------------------------|---------|-------------------------|-------------------|
| <i>RNF150</i> | chr4:141780961-14254623 | 4q31.21 | ring finger protein 150 | protein<br>coding |
|---------------|-------------------------|---------|-------------------------|-------------------|
